# Supplementary material
Source: PubMed Central journal article supplement (PMC7263451)
Supplement: ehp5818.s001.acco.pdf [file ehp5818.s001.acco.pdf]

**Note to readers with disabilities:** *EHP* strives to ensure that all journal content is accessible to all readers. However, some figures and Supplemental Material published in *EHP* articles may not conform to [508 standards](#) due to the complexity of the information being presented. If you need assistance accessing journal content, please contact [ehp508@niehs.nih.gov](mailto:ehp508@niehs.nih.gov). Our staff will work with you to assess and meet your accessibility needs within 3 working days.

### **Supplemental Material**

#### **Long-Term Exposure to Air Pollution and Incidence of Myocardial Infarction: A Danish Nurse Cohort Study**

Johannah Cramer, Jeanette T. Jørgensen, Barbara Hoffmann, Steffen Loft, Elvira V. Bräuner, Eva Prescott, Matthias Ketzel, Ole Hertel, Jørgen Brandt, Steen S. Jensen, Claus Backalarz, Mette K. Simonsen, and Zorana J. Andersen

#### **Table of Contents**

**Table S1.** Descriptive statistics for female nurses from the Danish Nurse Cohort at year of cohort entry in 1993 or 1999, according to study inclusion exclusion status.

**Table S2.** Correlations between road traffic noise and air pollutants (annual mean) at the year of cohort entry in 1993 or 1999, overall and according to urbanicity.

**Table S3.** Secular trends in the correlations between road traffic noise and air pollutants (annual mean) at the year of cohort entry in 1993 or 1999.

**Table S4.** Associations between long-term exposure to air pollution and both overall and fatal incident MI in the Danish Nurse Cohort.

**Table S5.** Confounding of the association between a 1-year running mean exposure to PM<sub>2.5</sub> or PM<sub>10</sub> and both overall and fatal incident MI.

**Table S6.** Associations between long-term exposure to air pollution and fatal incident MI in the Danish Nurse Cohort, restricted to cases identified through the Danish Registry of Causes of Death.

**Table S7.** Associations between a 1- and 3-year running mean exposure of PM<sub>2.5</sub> (5.3 µg/m<sup>3</sup>), and both overall and fatal incident MI in the Danish Nurse Cohort, in Cox models employing multiple modes of adjustment for calendar effects.

**Table S8.** All possible exposure windows for each pollutant, correlated with calendar year (1993-2015) and birth cohort (5-year intervals), among 22,882 nurses from the Danish Nurse Cohort.

**Table S9.** Effect modification of the association between residential PM<sub>2.5</sub> concentration (modeled as a continuous variable, 1-year mean, per IQR increase) and both overall and fatal incident MI in the Danish Nurse Cohort.

**Figure S1.** Mean annual residential exposure levels for PM<sub>2.5</sub>, PM<sub>10</sub>, NO<sub>2</sub>, and NO<sub>x</sub> throughout the study period (1993-2015).

Supplemental Table S1. Descriptive statistics for female nurses from the Danish Nurse Cohort at year of cohort entry in 1993 or 1999, according to study inclusion exclusion status.

|                                                 | Total<br>N = 28,731 | Included<br>N = 22,882 | Excluded<br>N = 5,849 |
|-------------------------------------------------|---------------------|------------------------|-----------------------|
| MI, n (%)                                       |                     |                        |                       |
| Prevalent                                       | 295 (1.0)           | 0 (0.0)                | 295 (5.0)             |
| Incident                                        | 952 (3.3)           | 641 (2.8)              | 311 (5.3)             |
| Never                                           | 27,484 (95.7)       | 22,241 (97.2)          | 5,243 (89.6)          |
| Fatal MI, n (%)                                 |                     |                        |                       |
| No                                              | 28,518 (99.3)       | 22,761 (99.5)          | 5,757 (98.4)          |
| Yes                                             | 213 (0.7)           | 121 (0.5)              | 92 (1.6)              |
| Age, mean (SD)                                  | 53.9 (8.5)          | 52.8 (7.7)             | 58.0 (10.2)           |
| Body mass index (kg/m <sup>2</sup> ), mean (SD) | 23.7 (3.5)          | 23.7 (3.7)             | 23.7 (3.5)            |
| Body mass index (kg/m <sup>2</sup> ), n (%)     |                     |                        |                       |
| Underweight (< 18.5)                            | 755 (2.7)           | 553 (2.4)              | 202 (3.7)             |
| Normal weight (18.5-25)                         | 19,488 (68.7)       | 15,820 (69.1)          | 3,668 (66.8)          |
| Overweight (25-30)                              | 6,535 (23.0)        | 5,214 (22.8)           | 1,321 (24.1)          |
| Obese (≥ 30)                                    | 1,594 (5.6)         | 1,295 (5.7)            | 299 (5.4)             |
| Smoking status, n (%)                           |                     |                        |                       |
| Never                                           | 9,437 (34.0)        | 8,224 (35.9)           | 1,213 (24.8)          |
| Previous                                        | 8,496 (30.6)        | 6,877 (30.1)           | 1,619 (33.1)          |
| Current                                         | 9,833 (35.4)        | 7,781 (34.0)           | 2,052 (42.0)          |
| Pack years, n (%)                               |                     |                        |                       |
| Never smoked                                    | 9,437 (35.5)        | 8,224 (35.9)           | 1,213 (32.5)          |
| ≤ 10                                            | 7,377 (27.7)        | 6,458 (28.2)           | 919 (24.6)            |
| 11 - 20                                         | 4,413 (16.6)        | 3,723 (16.3)           | 690 (18.5)            |
| > 20                                            | 5,384 (20.2)        | 4,477 (19.6)           | 907 (24.3)            |
| Alcohol consumption, n (%)                      |                     |                        |                       |
| None (0 drinks/week)                            | 4,600 (16.5)        | 3,426 (15.0)           | 1,174 (23.5)          |
| Moderate (1-15 drinks/week)                     | 16,980 (60.9)       | 14,210 (62.1)          | 2,770 (55.5)          |
| Heavy (> 15 drinks/week)                        | 6,289 (22.6)        | 5,246 (22.9)           | 1,043 (20.9)          |
| Physical activity, n (%)                        |                     |                        |                       |
| Low                                             | 2,053 (7.2)         | 1,454 (6.4)            | 599 (10.9)            |
| Medium                                          | 18,818 (66.3)       | 15,273 (66.7)          | 3,545 (64.6)          |
| High                                            | 7,499 (26.4)        | 6,155 (26.9)           | 1,344 (24.5)          |
| Fruit consumption, n (%)                        |                     |                        |                       |
| Rarely                                          | 1,056 (3.7)         | 828 (3.6)              | 228 (4.2)             |
| Few times per week                              | 7,998 (28.3)        | 6,516 (28.5)           | 1,482 (27.5)          |
| Daily or several times per day                  | 19,219 (68.0)       | 15,538 (67.9)          | 3,681 (68.3)          |
| Avoids fatty meat, n (%)                        |                     |                        |                       |
| No                                              | 2,914 (10.2)        | 2,123 (9.3)            | 791 (13.8)            |
| Yes                                             | 25,690 (89.8)       | 20,759 (90.7)          | 4,931 (86.2)          |
| Hypertension <sup>a</sup> , n (%)               |                     |                        |                       |
| No                                              | 24,774 (86.4)       | 20,054 (87.6)          | 4,720 (81.3)          |
| Yes                                             | 3,912 (13.6)        | 2,828 (12.4)           | 1,084 (18.7)          |
| Diabetes <sup>a</sup> , n (%)                   |                     |                        |                       |
| No                                              | 28,095 (98.7)       | 22,628 (98.9)          | 5,467 (97.8)          |
| Yes                                             | 376 (1.3)           | 254 (1.1)              | 122 (2.2)             |
| Hormone therapy use, n (%)                      |                     |                        |                       |
| Never                                           | 20,353 (72.1)       | 16,677 (72.9)          | 3,676 (68.8)          |
| Past                                            | 2,951 (10.5)        | 2,236 (9.8)            | 715 (13.4)            |
| Current                                         | 4,920 (17.4)        | 3,969 (17.3)           | 951 (17.8)            |

|                                                                         |                         |                          |                          |
|-------------------------------------------------------------------------|-------------------------|--------------------------|--------------------------|
| Oral contraceptive use, n (%)                                           |                         |                          |                          |
| Never                                                                   | 12,358 (43.3)           | 9,140 (39.9)             | 3,218 (56.8)             |
| Ever                                                                    | 16,193 (56.7)           | 13,742 (60.1)            | 2,451 (43.2)             |
| Menopausal status                                                       |                         |                          |                          |
| Premenopausal                                                           | 13,375 (46.6)           | 11,504 (50.3)            | 1,871 (32.0)             |
| Postmenopausal                                                          | 15,356 (53.4)           | 11,378 (49.7)            | 3,978 (68.0)             |
| Employment status, n (%)                                                |                         |                          |                          |
| Actively working                                                        | 21,240 (75.7)           | 18,305 (80.0)            | 2,935 (56.7)             |
| Home-maker                                                              | 525 (1.9)               | 407 (1.8)                | 118 (2.3)                |
| Retired                                                                 | 5,863 (20.9)            | 3,808 (16.6)             | 2,055 (39.7)             |
| Unemployed/rehabilitation                                               | 192 (0.7)               | 149 (0.7)                | 43 (0.8)                 |
| Other                                                                   | 242 (0.9)               | 213 (0.9)                | 29 (0.6)                 |
| Marital status, n (%)                                                   |                         |                          |                          |
| Married                                                                 | 19,883 (69.8)           | 16,262 (71.1)            | 3,621 (64.6)             |
| Separated                                                               | 459 (1.6)               | 388 (1.7)                | 71 (1.3)                 |
| Divorced                                                                | 3,130 (11.0)            | 2,593 (11.3)             | 537 (9.6)                |
| Single                                                                  | 2,918 (10.2)            | 2,210 (9.7)              | 708 (12.6)               |
| Widowed                                                                 | 2,094 (7.4)             | 1,429 (6.2)              | 665 (11.9)               |
| Urbanization level, n (%)                                               |                         |                          |                          |
| Rural                                                                   | 11,655 (41.8)           | 9,428 (41.2)             | 2,227 (44.7)             |
| Provincial                                                              | 12,045 (43.2)           | 9,973 (43.6)             | 2,072 (41.6)             |
| Urban                                                                   | 4,167 (15.0)            | 3,481 (15.2)             | 686 (13.8)               |
| Average municipality income <sup>b</sup><br>(DKK), mean (SD)            | 164,263.5<br>(24,569.8) | 164,487.4<br>(24,855.9)  | 163,235.8<br>(23,186.1)  |
| Air pollution levels at cohort entry (1-<br>year mean) <sup>c</sup>     |                         |                          |                          |
| PM <sub>2.5</sub> levels (µg/ m <sup>3</sup> ), mean (SD)               | 19.8 (3.6)              | 19.6 (3.6) <sup>c</sup>  | 20.4 (3.4) <sup>d</sup>  |
| PM <sub>10</sub> levels (µg/ m <sup>3</sup> ), mean (SD)                | 23.6 (3.9)              | 23.5 (3.9) <sup>c</sup>  | 24.5 (3.6) <sup>d</sup>  |
| NO <sub>2</sub> levels (µg/ m <sup>3</sup> ), mean (SD)                 | 12.7 (8.1)              | 12.6 (8.1) <sup>c</sup>  | 12.7 (8.2) <sup>d</sup>  |
| NO <sub>x</sub> levels (µg/ m <sup>3</sup> ), mean (SD)                 | 19.2 (24.4)             | 19.1 (24.4) <sup>c</sup> | 19.6 (24.6) <sup>d</sup> |
| Road traffic noise levels at cohort<br>entry (1-year mean) <sup>e</sup> |                         |                          |                          |
| L <sub>den</sub> , (dB), mean (SD)                                      | 52.8 (8.1)              | 52.8 (8.2) <sup>g</sup>  | 53.0 (8.1) <sup>f</sup>  |

Note: Myocardial infarction (MI); standard deviation (SD); Danish Crowns (DKK); Particulate matter with an aerodynamic diameter of < 2.5 µg/m<sup>3</sup> (PM<sub>2.5</sub>), <10 µg/m<sup>3</sup> (PM<sub>10</sub>); Nitrogen dioxide (NO<sub>2</sub>); Nitrogen oxides (NO<sub>x</sub>); Joint expression of day (L<sub>d</sub>; 07:00-19:00 hours (h)), evening (L<sub>e</sub>; 19:00-22:00 h), and night (L<sub>n</sub>; 22:00-07:00 h) road traffic noise levels, with 5 and 10 dB penalties added to the evening and night estimates, respectively (L<sub>den</sub>)

<sup>a</sup>Self-reported (diagnosis/medication for).

<sup>b</sup>in 1993

<sup>c</sup>Among 21,403 participants with available air pollution data at the year of cohort entry.

<sup>d</sup>Among 4,392 participants with available air pollution data at the year of cohort entry

<sup>e</sup>Annual weighted (5 dB penalty added to l<sub>e</sub> and 10 dB penalty added to l<sub>n</sub>) mean.

<sup>f</sup>Among 5,756 participants with available road traffic noise data at the year of cohort entry.

<sup>g</sup>Among 22,715 participants with available road traffic noise data at the year of cohort entry.

Supplemental Table S2. Correlations between road traffic noise and air pollutants (annual mean) at the year of cohort entry in 1993 or 1999, overall and according to urbanicity.

|                   |  | L <sub>den</sub> | PM <sub>2.5</sub> | PM <sub>10</sub> | NO <sub>2</sub> | NO <sub>x</sub> |
|-------------------|--|------------------|-------------------|------------------|-----------------|-----------------|
| L <sub>den</sub>  |  | 1.0000           |                   |                  |                 |                 |
| PM <sub>2.5</sub> |  | 0.3593           | 1.0000            |                  |                 |                 |
| PM <sub>10</sub>  |  | 0.2434           | 0.8542            | 1.0000           |                 |                 |
| NO <sub>2</sub>   |  | 0.6062           | 0.6513            | 0.5200           | 1.0000          |                 |
| NO <sub>x</sub>   |  | 0.4944           | 0.5731            | 0.5473           | 0.9216          | 1.0000          |
| <hr/>             |  |                  |                   |                  |                 |                 |
|                   |  | L <sub>den</sub> | PM <sub>2.5</sub> | PM <sub>10</sub> | NO <sub>2</sub> | NO <sub>x</sub> |
| Rural areas       |  |                  |                   |                  |                 |                 |
| L <sub>den</sub>  |  | 1.0000           |                   |                  |                 |                 |
| PM <sub>2.5</sub> |  | 0.1837           | 1.0000            |                  |                 |                 |
| PM <sub>10</sub>  |  | 0.1468           | 0.7620            | 1.0000           |                 |                 |
| NO <sub>2</sub>   |  | 0.5146           | 0.4631            | 0.2988           | 1.0000          |                 |
| NO <sub>x</sub>   |  | 0.4813           | 0.3427            | 0.2920           | 0.9305          | 1.0000          |
| Provincial areas  |  |                  |                   |                  |                 |                 |
| L <sub>den</sub>  |  | 1.0000           |                   |                  |                 |                 |
| PM <sub>2.5</sub> |  | 0.2122           | 1.0000            |                  |                 |                 |
| PM <sub>10</sub>  |  | 0.1988           | 0.9071            | 1.0000           |                 |                 |
| NO <sub>2</sub>   |  | 0.5611           | 0.5017            | 0.4662           | 1.0000          |                 |
| NO <sub>x</sub>   |  | 0.4988           | 0.4368            | 0.4737           | 0.9342          | 1.0000          |
| Urban areas       |  |                  |                   |                  |                 |                 |
| L <sub>den</sub>  |  | 1.0000           |                   |                  |                 |                 |
| PM <sub>2.5</sub> |  | 0.3342           | 1.0000            |                  |                 |                 |
| PM <sub>10</sub>  |  | 0.3779           | 0.9927            | 1.0000           |                 |                 |
| NO <sub>2</sub>   |  | 0.5604           | 0.7726            | 0.8309           | 1.0000          |                 |
| NO <sub>x</sub>   |  | 0.5202           | 0.7521            | 0.8188           | 0.9567          | 1.0000          |

Note: Particulate matter with an aerodynamic diameter of  $< 2.5 \mu\text{g}/\text{m}^3$  (PM<sub>2.5</sub>),  $< 10 \mu\text{g}/\text{m}^3$  (PM<sub>10</sub>); Nitrogen dioxide (NO<sub>2</sub>); Nitrogen oxides (NO<sub>x</sub>); Joint expression of day (L<sub>d</sub>; 07:00-19:00 hours (h)), evening (L<sub>e</sub>; 19:00-22:00 h), and night (L<sub>n</sub>; 22:00-07:00 h) road traffic noise levels, with 5 and 10 dB penalties added to the evening and night estimates, respectively (L<sub>den</sub>).

Supplemental Table S3. Secular trends in the correlations between road traffic noise and air pollutants (annual mean) at the year of cohort entry in 1993 or 1999.

|                   | L <sub>den</sub> | PM <sub>2.5</sub> | PM <sub>10</sub> | NO <sub>2</sub> | NO <sub>x</sub> |
|-------------------|------------------|-------------------|------------------|-----------------|-----------------|
| 1990              |                  |                   |                  |                 |                 |
| L <sub>den</sub>  | 1.0000           |                   |                  |                 |                 |
| PM <sub>2.5</sub> | 0.4655           | 1.0000            |                  |                 |                 |
| PM <sub>10</sub>  | 0.3104           | 0.7122            | 1.0000           |                 |                 |
| NO <sub>2</sub>   | 0.6121           | 0.7471            | 0.5847           | 1.0000          |                 |
| NO <sub>x</sub>   | 0.5092           | 0.6677            | 0.6406           | 0.9317          | 1.0000          |
| 1995              |                  |                   |                  |                 |                 |
| L <sub>den</sub>  | 1.0000           |                   |                  |                 |                 |
| PM <sub>2.5</sub> | 0.4766           | 1.0000            |                  |                 |                 |
| PM <sub>10</sub>  | 0.3352           | 0.7310            | 1.0000           |                 |                 |
| NO <sub>2</sub>   | 0.6186           | 0.7687            | 0.6140           | 1.0000          |                 |
| NO <sub>x</sub>   | 0.5101           | 0.6932            | 0.6899           | 0.9203          | 1.0000          |
| 2000              |                  |                   |                  |                 |                 |
| L <sub>den</sub>  | 1.0000           |                   |                  |                 |                 |
| PM <sub>2.5</sub> | 0.4663           | 1.0000            |                  |                 |                 |
| PM <sub>10</sub>  | 0.3400           | 0.7156            | 1.0000           |                 |                 |
| NO <sub>2</sub>   | 0.6158           | 0.7431            | 0.6210           | 1.0000          |                 |
| NO <sub>x</sub>   | 0.5180           | 0.6580            | 0.6891           | 0.9293          | 1.0000          |
| 2005              |                  |                   |                  |                 |                 |
| L <sub>den</sub>  | 1.0000           |                   |                  |                 |                 |
| PM <sub>2.5</sub> | 0.4405           | 1.0000            |                  |                 |                 |
| PM <sub>10</sub>  | 0.3169           | 0.6792            | 1.0000           |                 |                 |
| NO <sub>2</sub>   | 0.6203           | 0.7076            | 0.5560           | 1.0000          |                 |
| NO <sub>x</sub>   | 0.5359           | 0.6118            | 0.6330           | 0.9244          | 1.0000          |
| 2010              |                  |                   |                  |                 |                 |
| L <sub>den</sub>  | 1.0000           |                   |                  |                 |                 |
| PM <sub>2.5</sub> | 0.4450           | 1.0000            |                  |                 |                 |
| PM <sub>10</sub>  | 0.3408           | 0.6824            | 1.0000           |                 |                 |
| NO <sub>2</sub>   | 0.6195           | 0.7055            | 0.6067           | 1.0000          |                 |
| NO <sub>x</sub>   | 0.5417           | 0.6148            | 0.6843           | 0.9365          | 1.0000          |
| 2014              |                  |                   |                  |                 |                 |
| L <sub>den</sub>  | 1.0000           |                   |                  |                 |                 |
| PM <sub>2.5</sub> | 0.4484           | 1.0000            |                  |                 |                 |
| PM <sub>10</sub>  | 0.2767           | 0.6034            | 1.0000           |                 |                 |
| NO <sub>2</sub>   | 0.6153           | 0.7332            | 0.5235           | 1.0000          |                 |
| NO <sub>x</sub>   | 0.5490           | 0.6720            | 0.6358           | 0.9433          | 1.0000          |

Note: Particulate matter with an aerodynamic diameter of < 2.5 µg/m<sup>3</sup> (PM<sub>2.5</sub>), <10 µg/m<sup>3</sup> (PM<sub>10</sub>); Nitrogen dioxide (NO<sub>2</sub>); Nitrogen oxides (NO<sub>x</sub>); Joint expression of day (L<sub>d</sub>; 07:00-19:00 hours (h)), evening (L<sub>e</sub>; 19:00-22:00 h), and night (L<sub>n</sub>; 22:00-07:00 h) road traffic noise levels, with 5 and 10 dB penalties added to the evening and night estimates, respectively (L<sub>den</sub>).

Supplemental Table S4. Associations between long-term exposure to air pollution and both overall and fatal incident MI in the Danish Nurse Cohort.

|                            | Model 1 <sup>a</sup> | Model 2 <sup>b</sup> | Model 4<br>(Model 2 <sup>b</sup> + BMI) | Model 5<br>(Model 2 <sup>b</sup> +<br>Diabetes) | Model 6<br>(Model 2 <sup>b</sup> +<br>Hypertension) | Model 7<br>(Model 2 <sup>b</sup> +<br>Municipality<br>income <sup>c</sup> ) |
|----------------------------|----------------------|----------------------|-----------------------------------------|-------------------------------------------------|-----------------------------------------------------|-----------------------------------------------------------------------------|
|                            | HR (95% CI)          | HR (95% CI)          | HR (95% CI)                             | HR (95% CI)                                     | HR (95% CI)                                         | HR (95% CI)                                                                 |
| <b>Overall incident MI</b> |                      |                      |                                         |                                                 |                                                     |                                                                             |
| <b>1-year mean</b>         |                      |                      |                                         |                                                 |                                                     |                                                                             |
| N (cases)                  | 22,884 (641)         | 22,884 (641)         | 22,884 (641)                            | 22,884 (641)                                    | 22,884 (641)                                        | 22,884 (641)                                                                |
| PM <sub>2.5</sub>          | 1.17 (1.05-1.31)     | 1.05 (0.92-1.19)     | 1.05 (0.92-1.19)                        | 1.04 (0.91-1.19)                                | 1.02 (0.89-1.16)                                    | 1.04 (0.91-1.19)                                                            |
| PM <sub>10</sub>           | 1.19 (1.07-1.31)     | 1.04 (0.92-1.17)     | 1.04 (0.92-1.18)                        | 1.04 (0.92-1.17)                                | 1.02 (0.90-1.15)                                    | 1.04 (0.92-1.17)                                                            |
| NO <sub>2</sub>            | 1.03 (0.95-1.13)     | 1.04 (0.94-1.16)     | 1.04 (0.93-1.17)                        | 1.04 (0.93-1.17)                                | 1.04 (0.93-1.17)                                    | 1.04 (0.93-1.17)                                                            |
| NO <sub>x</sub>            | 1.03 (0.98-1.07)     | 1.02 (0.97-1.07)     | 1.02 (0.97-1.08)                        | 1.02 (0.97-1.08)                                | 1.02 (0.97-1.08)                                    | 1.02 (0.97-1.08)                                                            |
| <b>3-year mean</b>         |                      |                      |                                         |                                                 |                                                     |                                                                             |
| N (cases)                  | 22,887 (641)         | 22,887 (641)         | 22,887 (641)                            | 22,887 (641)                                    | 22,887 (641)                                        | 22,887 (641)                                                                |
| PM <sub>2.5</sub>          | 1.20 (1.07-1.35)     | 1.06 (0.92-1.23)     | 1.07 (0.92-1.23)                        | 1.06 (0.92-1.22)                                | 1.03 (0.89-1.19)                                    | 1.06 (0.92-1.23)                                                            |
| PM <sub>10</sub>           | 1.22 (1.09-1.35)     | 1.06 (0.93-1.21)     | 1.06 (0.93-1.21)                        | 1.06 (0.93-1.20)                                | 1.04 (0.91-1.18)                                    | 1.06 (0.93-1.20)                                                            |
| NO <sub>2</sub>            | 1.04 (0.95-1.13)     | 1.05 (0.94-1.16)     | 1.05 (0.94-1.18)                        | 1.05 (0.94-1.18)                                | 1.05 (0.94-1.18)                                    | 1.05 (0.94-1.17)                                                            |
| NO <sub>x</sub>            | 1.03 (0.98-1.07)     | 1.02 (0.98-1.07)     | 1.03 (0.98-1.08)                        | 1.02 (0.97-1.08)                                | 1.03 (0.98-1.08)                                    | 1.02 (0.97-1.08)                                                            |
| <b>23-year mean</b>        |                      |                      |                                         |                                                 |                                                     |                                                                             |
| N (cases)                  | 22,902 (642)         | 22,902 (642)         | 22,902 (642)                            | 22,902 (642)                                    | 22,902 (642)                                        | 22,902 (642)                                                                |
| NO <sub>2</sub>            | 1.04 (0.96-1.13)     | 1.10 (0.99-1.22)     | 1.14 (1.02-1.28)                        | 1.14 (1.01-1.27)                                | 1.14 (1.02-1.28)                                    | 1.13 (1.01-1.27)                                                            |
| NO <sub>x</sub>            | 1.03 (1.00-1.07)     | 1.04 (1.00-1.08)     | 1.05 (1.01-1.09)                        | 1.05 (1.00-1.09)                                | 1.05 (1.01-1.10)                                    | 1.05 (1.00-1.09)                                                            |
| <b>Fatal incident MI</b>   |                      |                      |                                         |                                                 |                                                     |                                                                             |
| <b>1-year mean</b>         |                      |                      |                                         |                                                 |                                                     |                                                                             |
| N (cases)                  | 22,955 (123)         | 22,955 (123)         | 22,955 (123)                            | 22,955 (123)                                    | 22,955 (123)                                        | 22,955 (123)                                                                |
| PM <sub>2.5</sub>          | 1.75 (1.40-2.18)     | 1.47 (1.12-1.93)     | 1.50 (1.14-1.96)                        | 1.44 (1.11-1.86)                                | 1.44 (1.10-1.89)                                    | 1.48 (1.13-1.95)                                                            |
| PM <sub>10</sub>           | 1.75 (1.44-2.13)     | 1.43(1.12-1.81)      | 1.46 (1.15-1.86)                        | 1.43 (1.13-1.80)                                | 1.42 (1.11-1.81)                                    | 1.45 (1.14-1.84)                                                            |
| NO <sub>2</sub>            | 1.04 (0.86-1.26)     | 1.05 (0.83-1.31)     | 1.08 (0.85-1.39)                        | 1.09 (0.85-1.39)                                | 1.07 (0.84-1.37)                                    | 1.08 (0.84-1.38)                                                            |
| NO <sub>x</sub>            | 1.03 (0.93-1.14)     | 1.02 (0.91-1.13)     | 1.03 (0.92-1.15)                        | 1.03 (0.92-1.15)                                | 1.03 (0.92-1.15)                                    | 1.03 (0.92-1.15)                                                            |
| <b>3-year mean</b>         |                      |                      |                                         |                                                 |                                                     |                                                                             |
| N (cases)                  | 22,887 (121)         | 22,887 (121)         | 22,887 (121)                            | 22,887 (121)                                    | 22,887 (121)                                        | 22,887 (121)                                                                |
| PM <sub>2.5</sub>          | 1.69 (1.33-2.13)     | 1.35 (1.01-1.81)     | 1.39 (1.03-1.87)                        | 1.33 (1.00-1.75)                                | 1.33 (0.99-1.79)                                    | 1.38 (1.03-1.85)                                                            |

|                     |                  |                  |                  |                  |                   |                  |
|---------------------|------------------|------------------|------------------|------------------|-------------------|------------------|
| PM <sub>10</sub>    | 1.65 (1.34-2.03) | 1.28 (0.98-1.65) | 1.30 (1.00-1.70) | 1.28 (0.99-1.64) | 1.26* (0.97-1.64) | 1.29 (0.99-1.68) |
| NO <sub>2</sub>     | 1.02 (0.84-1.23) | 1.01 (0.80-1.28) | 1.05 (0.82-1.35) | 1.06 (0.83-1.36) | 1.04 (0.81-1.34)  | 1.05 (0.81-1.34) |
| NO <sub>x</sub>     | 1.02 (0.92-1.13) | 1.01 (0.90-1.12) | 1.02 (0.91-1.14) | 1.02 (0.91-1.14) | 1.02 (0.91-1.14)  | 1.02 (0.91-1.14) |
| <b>23-year mean</b> |                  |                  |                  |                  |                   |                  |
| N (cases)           | 22,902 (121)     | 22,902 (121)     | 22,902 (121)     | 22,902 (121)     | 22,902 (121)      | 22,902 (121)     |
| NO <sub>2</sub>     | 1.01 (0.84-1.22) | 1.08 (0.86-1.36) | 1.12 (0.87-1.44) | 1.13 (0.88-1.44) | 1.12 (0.87-1.44)  | 1.12 (0.87-1.43) |
| NO <sub>x</sub>     | 1.02 (0.94-1.11) | 1.03 (0.94-1.12) | 1.04 (0.94-1.14) | 1.04 (0.94-1.14) | 1.04 (0.94-1.14)  | 1.04 (0.94-1.14) |

Note: Body mass index (BMI); Myocardial infarction (MI); Hazard Ratio (HR); 95% Confidence interval (95% CI); Number (N); Particulate matter with an aerodynamic diameter of < 2.5 µg/m<sup>3</sup> (PM<sub>2.5</sub>), <10 µg/m<sup>3</sup> (PM<sub>10</sub>); Nitrogen dioxide (NO<sub>2</sub>); Nitrogen oxides (NO<sub>x</sub>); Joint expression of day (L<sub>d</sub>; 07:00-19:00 hours (h)), evening (L<sub>e</sub>; 19:00-22:00 h), and night (L<sub>n</sub>; 22:00-07:00 h) road traffic noise levels, with 5 and 10 dB penalties added to the evening and night estimates, respectively (L<sub>den</sub>). Estimates are based on interquartile range (IQR) increments for PM<sub>2.5</sub> (5.3 µg/m<sup>3</sup>), PM<sub>10</sub> (5.5 µg/m<sup>3</sup>), NO<sub>2</sub> (8.1 µg/m<sup>3</sup>), NO<sub>x</sub> (11.5 µg/m<sup>3</sup>), and L<sub>den</sub> (10 dB). Diabetes and hypertension are self-reported (diagnosis/medication for).

<sup>a</sup>Model 1: adjusted for age (underlying time) and year of cohort entry (1993/1999).

<sup>b</sup>Model 2: Model 1, further adjusted for smoking status, pack-years, consumption of fruit, avoidance of fatty meat, alcohol consumption, use of oral contraceptives, use of hormone therapy, physical activity, marital status, employment status, and level of urbanization.



Supplemental Table S5. Confounding of the association between a 1-year running mean exposure to PM<sub>2.5</sub> or PM<sub>10</sub> and both overall and fatal incident MI.

|                                           | Overall incident MI |                                  |                                 | Fatal incident MI |                                  |                                 |
|-------------------------------------------|---------------------|----------------------------------|---------------------------------|-------------------|----------------------------------|---------------------------------|
|                                           | Number (cases)      | PM <sub>2.5</sub><br>HR (95% CI) | PM <sub>10</sub><br>HR (95% CI) | Number (cases)    | PM <sub>2.5</sub><br>HR (95% CI) | PM <sub>10</sub><br>HR (95% CI) |
| <b>Model 1<sup>a</sup></b>                | 22,884 (641)        | 1.17 (1.05-1.31)                 | 1.19 (1.07-1.31)                | 22,955 (123)      | 1.75 (1.40-2.18)                 | 1.75 (1.44-2.13)                |
| <b>Model 1 +</b>                          |                     |                                  |                                 |                   |                                  |                                 |
| Smoking status                            | 22,884 (641)        | 1.17 (1.04 - 1.30)               | 1.18 (1.07 - 1.31)              | 22,955 (123)      | 1.75 (1.40 - 2.18)               | 1.76 (1.45 - 2.14)              |
| Pack-years                                | 22,884 (641)        | 1.14 (1.02 - 1.27)               | 1.16 (1.05 - 1.29)              | 22,955 (123)      | 1.70 (1.36 - 2.12)               | 1.72 (1.41 - 2.10)              |
| Consumption of fruit                      | 22,884 (641)        | 1.18 (1.06 - 1.31)               | 1.19 (1.08 - 1.32)              | 22,955 (123)      | 1.76 (1.41 - 2.19)               | 1.76 (1.45 - 2.14)              |
| Avoidance of fatty meat                   | 22,884 (641)        | 1.17 (1.05 - 1.31)               | 1.18 (1.07 - 1.31)              | 22,955 (123)      | 1.76 (1.41 - 2.19)               | 1.76 (1.44 - 2.14)              |
| Alcohol consumption                       | 22,884 (641)        | 1.16 (1.04 - 1.30)               | 1.17 (1.06 - 1.30)              | 22,955 (123)      | 1.74 (1.40 - 2.18)               | 1.74 (1.43 - 2.12)              |
| Oral contraceptive use                    | 22,884 (641)        | 1.15 (1.03 - 1.29)               | 1.17 (1.05 - 1.29)              | 22,955 (123)      | 1.65 (1.32 - 2.07)               | 1.66 (1.36 - 2.04)              |
| Hormone therapy use                       | 22,884 (641)        | 1.17 (1.04 - 1.30)               | 1.18 (1.06 - 1.31)              | 22,955 (123)      | 1.75 (1.40 - 2.18)               | 1.75 (1.44 - 2.12)              |
| Physical activity                         | 22,884 (641)        | 1.15 (1.03 - 1.28)               | 1.16 (1.05 - 1.29)              | 22,955 (123)      | 1.57 (1.26 - 1.97)               | 1.60 (1.31 - 1.96)              |
| Marital status                            | 22,884 (641)        | 1.17 (1.05 - 1.31)               | 1.19 (1.07 - 1.32)              | 22,955 (123)      | 1.61 (1.28 - 2.03)               | 1.63 (1.33 - 2.00)              |
| Employment status                         | 22,884 (641)        | 1.05 (0.93 - 1.18)               | 1.07 (0.95 - 1.20)              | 22,955 (123)      | 1.53 (1.19 - 1.95)               | 1.56 (1.25 - 1.94)              |
| Level of urbanization                     | 22,884 (641)        | 1.21 (1.08 - 1.36)               | 1.19 (1.07 - 1.32)              | 22,955 (123)      | 1.97 (1.56 - 2.49)               | 1.84 (1.50 - 2.25)              |
| Road traffic noise<br>(L <sub>den</sub> ) | 22,878 (641)        | 1.20 (1.07 - 1.34)               | 1.20 (1.08 - 1.33)              | 22,878 (121)      | 1.91 (1.51 - 2.41)               | 1.87 (1.52 - 2.30)              |
| <b>Model 2<sup>b</sup></b>                | 22,884 (641)        | 1.05 (0.92 - 1.19)               | 1.04 (0.92 - 1.17)              | 22,955 (123)      | 1.47 (1.12 - 1.93)               | 1.43 (1.12 - 1.81)              |
| <b>Model 3<sup>c</sup></b>                | 22,878 (641)        | 1.04 (0.91 - 1.19)               | 1.04 (0.92 - 1.17)              | 22,878 (121)      | 1.48 (1.13 - 1.95)               | 1.45 (1.14 - 1.84)              |

Note: Myocardial infarction (MI); Hazard Ratio (HR); 95% Confidence interval (95% CI); Particulate matter with an aerodynamic diameter of < 2.5 µg/m<sup>3</sup> (PM<sub>2.5</sub>), <10 µg/m<sup>3</sup> (PM<sub>10</sub>); Joint expression of day (L<sub>d</sub>; 07:00-19:00 hours (h)), evening (L<sub>e</sub>; 19:00-22:00 h), and night (L<sub>n</sub>; 22:00-07:00 h) road traffic noise levels, with 5 and 10 dB penalties added to the evening and night estimates, respectively (L<sub>den</sub>). Estimates are based on interquartile range (IQR) increments for PM<sub>2.5</sub> (5.3 µg/m<sup>3</sup>), PM<sub>10</sub> (5.5 µg/m<sup>3</sup>) and L<sub>den</sub> (10 dB).

<sup>a</sup>Model 1: adjusted for age (underlying time) and year of cohort entry (1993/1999).

<sup>b</sup>Model 2: Model 1, further adjusted for smoking status, pack-years, consumption of fruit, avoidance of fatty meat, alcohol consumption, use of oral contraceptives, use of hormone therapy, physical activity, marital status, employment status, and level of urbanization.

<sup>c</sup>Model 3: Model 2, further adjusted for L<sub>den</sub>

Supplemental Table S6. Associations between long-term exposure to air pollution and fatal incident MI in the Danish Nurse Cohort, restricted to cases identified through the Danish Registry of Causes of Death.

|                     | Danish Register of Causes of Death |                             |                                                   |
|---------------------|------------------------------------|-----------------------------|---------------------------------------------------|
|                     | Model 1                            | Model 2                     | Model 3                                           |
|                     | Crude <sup>a</sup>                 | Fully adjusted <sup>b</sup> | Fully adjusted <sup>b</sup> +<br>L <sub>den</sub> |
|                     | HR (95% CI)                        | HR (95% CI)                 | HR (95% CI)                                       |
| <b>1-year mean</b>  |                                    |                             |                                                   |
| N (cases)           | 22,884 (104)                       | 22,884 (104)                | 22,878 (104)                                      |
| PM <sub>2.5</sub>   | 1.82 (1.44 - 2.30)                 | 1.61 (1.21 - 2.15)          | 1.67 (1.25 - 2.23)                                |
| PM <sub>10</sub>    | 1.80 (1.46 - 2.22)                 | 1.53 (1.18 - 1.97)          | 1.58 (1.22 - 2.06)                                |
| NO <sub>2</sub>     | 1.05 (0.86 - 1.29)                 | 1.13 (0.89 - 1.42)          | 1.26 (0.96 - 1.64)                                |
| NO <sub>x</sub>     | 1.04 (0.94 - 1.15)                 | 1.05 (0.94 - 1.17)          | 1.09 (0.97 - 1.22)                                |
| <b>3-year mean</b>  |                                    |                             |                                                   |
| N (cases)           | 22,887 (104)                       | 22,887 (104)                | 22,882 (104)                                      |
| PM <sub>2.5</sub>   | 1.73 (1.34 - 2.22)                 | 1.47 (1.07 - 2.01)          | 1.52 (1.11 - 2.09)                                |
| PM <sub>10</sub>    | 1.68 (1.35 - 2.10)                 | 1.34 (1.01 - 1.77)          | 1.39 (1.04 - 1.85)                                |
| NO <sub>2</sub>     | 1.02 (0.83 - 1.25)                 | 1.09 (0.86 - 1.38)          | 1.20 (0.91 - 1.58)                                |
| NO <sub>x</sub>     | 1.03 (0.93 - 1.14)                 | 1.04 (0.93 - 1.16)          | 1.07 (0.96 - 1.20)                                |
| <b>23-year mean</b> |                                    |                             |                                                   |
| N (cases)           | 22,902 (104)                       | 22,902 (104)                | 22,902 (104)                                      |
| NO <sub>2</sub>     | 1.02 (0.84 - 1.25)                 | 1.18 (0.93 - 1.50)          | 1.19 (0.91 - 1.57)                                |
| NO <sub>x</sub>     | 1.04 (0.96 - 1.13)                 | 1.06 (0.97 - 1.16)          | 1.06 (0.96 - 1.17)                                |

Note: Myocardial infarction (MI); Hazard Ratio (HR); 95% Confidence interval (95% CI); Number (N); Particulate matter with an aerodynamic diameter of < 2.5 µg/m<sup>3</sup> (PM<sub>2.5</sub>), <10 µg/m<sup>3</sup> (PM<sub>10</sub>); Nitrogen dioxide (NO<sub>2</sub>); Nitrogen oxides (NO<sub>x</sub>); Joint expression of day (L<sub>d</sub>; 07:00-19:00 hours (h)), evening (L<sub>e</sub>; 19:00-22:00 h), and night (L<sub>n</sub>; 22:00-07:00 h) road traffic noise levels, with 5 and 10 dB penalties added to the evening and night estimates, respectively (L<sub>den</sub>). Estimates are based on interquartile range (IQR) increments for PM<sub>2.5</sub> (5.3 µg/m<sup>3</sup>), PM<sub>10</sub> (5.5 µg/m<sup>3</sup>), NO<sub>2</sub>, (8.1 µg/m<sup>3</sup>), NO<sub>x</sub> (11.5 µg/m<sup>3</sup>), and L<sub>den</sub> (10 dB). <sup>a</sup>Crude model, adjusted for age (underlying time) and year of cohort entry (1993/1999).

<sup>a</sup>Model 1: adjusted for age (underlying time) and year of cohort entry (1993/1999).

<sup>b</sup>Model 2: Model 1, further adjusted for smoking status, pack-years, consumption of fruit, avoidance of fatty meat, alcohol consumption, use of oral contraceptives, use of hormone therapy, physical activity, marital status, employment status, and level of urbanization.

<sup>c</sup>Model 3: Model 2, further adjusted for L<sub>den</sub>

Supplemental Table S7. Associations between a 1- and 3-year running mean exposure of PM<sub>2.5</sub> (5.3 µg/m<sup>3</sup>), and both overall and fatal incident MI in the Danish Nurse Cohort, in Cox models employing multiple modes of adjustment for calendar effects.

|                                | Overall incident MI  |                      |                      | Fatal incident MI    |                      |                      |
|--------------------------------|----------------------|----------------------|----------------------|----------------------|----------------------|----------------------|
|                                | Model 1 <sup>a</sup> | Model 2 <sup>b</sup> | Model 3 <sup>b</sup> | Model 1 <sup>a</sup> | Model 2 <sup>b</sup> | Model 3 <sup>b</sup> |
|                                | HR (95% CI)          |
| <b>1-year mean</b>             |                      |                      |                      |                      |                      |                      |
| N (cases)                      | 22,884 (641)         | 22,884 (641)         | 22,878 (641)         | 22,955 (123)         | 22,955 (123)         | 22,878 (121)         |
| Original                       | 1.17 (1.05-1.31)     | 1.05 (0.92-1.19)     | 1.04 (0.91-1.19)     | 1.75 (1.40-2.18)     | 1.47 (1.12-1.93)     | 1.48 (1.13-1.95)     |
| Original +                     |                      |                      |                      |                      |                      |                      |
| Calendar year (continuous)     | 1.05 (0.89-1.23)     | 1.09 (0.92-1.30)     | 1.10 (0.92-1.31)     | 1.14 (0.81-1.60)     | 1.32 (0.91-1.92)     | 1.39 (0.95-2.04)     |
| Calendar year (strata, 1 year) | 1.06 (0.86-1.31)     | 1.16 (0.92-1.48)     | 1.16 (0.90-1.50)     | 0.83 (0.52-1.32)     | 0.98 (0.56-1.69)     | 0.99 (0.56-1.75)     |
| Birth cohort (strata, 5 years) | 1.17 (1.01-1.35)     | 1.15 (0.98-1.35)     | 1.15 (0.98-1.35)     | 1.46 (1.08-1.98)     | 1.52 (1.08-2.15)     | 1.60 (1.12-2.27)     |
| <b>3-year mean</b>             |                      |                      |                      |                      |                      |                      |
| N (cases)                      | 22,887 (641)         | 22,887 (641)         | 22,882 (641)         | 22,887 (121)         | 22,887 (121)         | 22,882 (121)         |
| Original                       | 1.20 (1.07-1.35)     | 1.06 (0.92-1.23)     | 1.06 (0.92-1.23)     | 1.69 (1.33-2.13)     | 1.35 (1.01-1.81)     | 1.38 (1.03-1.85)     |
| Original +                     |                      |                      |                      |                      |                      |                      |
| Calendar year (continuous)     | 1.07 (0.90-1.28)     | 1.15 (0.94-1.41)     | 1.16 (0.94-1.43)     | 0.92 (0.63-1.36)     | 1.07 (0.69-1.66)     | 1.13 (0.72-1.79)     |
| Calendar year (strata, 1 year) | 1.07 (0.87-1.30)     | 1.18 (0.93-1.48)     | 1.18 (0.92-1.51)     | 0.85 (0.54-1.34)     | 1.00 (0.59-1.72)     | 1.02 (0.58-1.80)     |
| Birth cohort (strata, 5 years) | 1.18 (0.99-1.41)     | 1.18 (0.99-1.41)     | 1.26 (1.04-1.53)     | 1.25 (0.87-1.78)     | 1.25 (0.87-1.78)     | 1.40 (0.96-2.04)     |

Note: Myocardial infarction (MI); Hazard Ratio (HR); 95% Confidence interval (95% CI); Number (N); Particulate matter with an aerodynamic diameter of < 2.5 µg/m<sup>3</sup> (PM<sub>2.5</sub>); Joint expression of day (L<sub>d</sub>; 07:00-19:00 hours (h)), evening (L<sub>e</sub>; 19:00-22:00 h), and night (L<sub>n</sub>; 22:00-07:00 h) road traffic noise levels, with 5 and 10 dB penalties added to the evening and night estimates, respectively (L<sub>den</sub>). Estimates are based on interquartile range (IQR) increments for PM<sub>2.5</sub> (5.3 µg/m<sup>3</sup>) and L<sub>den</sub> (10 dB).

<sup>a</sup>Model 1: adjusted for age (underlying time) and year of cohort entry (1993/1999).

<sup>b</sup>Model 2: Model 1, further adjusted for smoking status, pack-years, consumption of fruit, avoidance of fatty meat, alcohol consumption, use of oral contraceptives, use of hormone therapy, physical activity, marital status, employment status, and level of urbanization.

<sup>c</sup>Model 3: Model 2, further adjusted for L<sub>den</sub>.

Supplemental Table S8. All possible exposure windows for each pollutant, correlated with calendar year (1993-2015) and birth cohort (5-year intervals), among 22,882 nurses from the Danish Nurse Cohort.

| Pollutant         | Calendar Year | Birth Cohort |
|-------------------|---------------|--------------|
| <b>1-year</b>     |               |              |
| PM <sub>2.5</sub> | -0.7618       | -0.1928      |
| PM <sub>10</sub>  | -0.7824       | -0.2019      |
| NO <sub>2</sub>   | -0.1894       | -0.1084      |
| NO <sub>x</sub>   | -0.1566       | -0.0922      |
| L <sub>den</sub>  | 0.0206        | -0.0776      |
| <b>3-year</b>     |               |              |
| PM <sub>2.5</sub> | -0.7895       | -0.2023      |
| PM <sub>10</sub>  | -0.8190       | -0.2107      |
| NO <sub>2</sub>   | -0.1833       | -0.1040      |
| NO <sub>x</sub>   | -0.1558       | -0.0919      |
| L <sub>den</sub>  | 0.0214        | -0.0757      |
| <b>23-year</b>    |               |              |
| NO <sub>2</sub>   | -0.0380       | -0.0614      |
| NO <sub>x</sub>   | -0.0923       | -0.0649      |
| L <sub>den</sub>  | 0.0153        | -0.0392      |

Note: Particulate matter with an aerodynamic diameter of  $< 2.5 \mu\text{g}/\text{m}^3$  (PM<sub>2.5</sub>),  $< 10 \mu\text{g}/\text{m}^3$  (PM<sub>10</sub>); Nitrogen dioxide (NO<sub>2</sub>); Nitrogen oxides (NO<sub>x</sub>); Joint expression of day (L<sub>d</sub>; 07:00-19:00 hours (h)), evening (L<sub>e</sub>; 19:00-22:00 h), and night (L<sub>n</sub>; 22:00-07:00 h) road traffic noise levels, with 5 and 10 dB penalties added to the evening and night estimates, respectively (L<sub>den</sub>).

Supplemental Table S9. Effect modification of the association between residential PM<sub>2.5</sub> concentration (modeled as a continuous variable, 1-year mean, per IQR increase) and both overall and fatal incident MI in the Danish Nurse Cohort.

|                                                          | Overall incident MI |                                     |                      | Fatal incident MI |                                     |                      |
|----------------------------------------------------------|---------------------|-------------------------------------|----------------------|-------------------|-------------------------------------|----------------------|
|                                                          | N                   | Model 3 <sup>a</sup><br>HR (95% CI) | p-value <sup>b</sup> | N                 | Model 3 <sup>a</sup><br>HR (95% CI) | p-value <sup>b</sup> |
| Age at baseline                                          |                     |                                     |                      |                   |                                     |                      |
| < 65                                                     | 472                 | 1.00 (0.84-1.18)                    |                      | 61                | 1.39 (0.88-2.19)                    |                      |
| ≥ 65                                                     | 169                 | 1.09 (0.85-1.41)                    | 0.70                 | 60                | 1.44 (0.98-2.13)                    | 1.00                 |
| Road Traffic Noise (dB) (L <sub>den</sub> ) <sup>c</sup> |                     |                                     |                      |                   |                                     |                      |
| Low (< 50.4)                                             | 175                 | 1.01 (0.78-1.32)                    |                      | 34                | 2.06 (1.19-3.55)                    |                      |
| Medium (50.4-56.2)                                       | 215                 | 1.02 (0.80-1.30)                    |                      | 40                | 1.44 (0.83-2.49)                    |                      |
| High (≥56.2)                                             | 251                 | 1.08 (0.89-1.32)                    | 0.94                 | 47                | 1.36 (0.91-2.05)                    | 0.92                 |
| Obesity <sup>d</sup>                                     |                     |                                     |                      |                   |                                     |                      |
| Not obese                                                | 592                 | 1.06 (0.93-1.22)                    |                      | 112               | 1.47 (1.11-1.94)                    |                      |
| Obese                                                    | 49                  | 0.86 (0.52-1.42)                    | 0.57                 | 9                 | 2.34 (0.63-8.73)                    | 0.71                 |
| Physical activity                                        |                     |                                     |                      |                   |                                     |                      |
| Low                                                      | 64                  | 0.94 (0.64-1.38)                    |                      | 26                | 1.43 (0.85-2.40)                    |                      |
| Medium                                                   | 439                 | 1.07 (0.92-1.26)                    |                      | 78                | 1.49 (1.04-2.13)                    |                      |
| High                                                     | 138                 | 0.98 (0.72-1.33)                    | 0.39                 | 17                | 1.51 (0.65-3.50)                    | 0.95                 |
| Smoking status                                           |                     |                                     |                      |                   |                                     |                      |
| Never                                                    | 170                 | 0.94 (0.73-1.22)                    |                      | 28                | 1.39 (0.82-2.36)                    |                      |
| Previous                                                 | 164                 | 1.14 (0.88-1.47)                    |                      | 27                | 2.08 (1.17-3.71)                    |                      |
| Current                                                  | 307                 | 1.04 (0.86-1.26)                    | 0.60                 | 66                | 1.30 (0.88-1.92)                    | 0.32                 |
| Hypertension <sup>e</sup>                                |                     |                                     |                      |                   |                                     |                      |
| No                                                       | 462                 | 0.97 (0.83-1.13)                    |                      | 77                | 1.33 (0.94-1.88)                    |                      |
| Yes                                                      | 179                 | 1.16 (0.91-1.49)                    | 0.09                 | 44                | 1.73 (1.09-2.75)                    | 0.80                 |
| Diabetes <sup>e</sup>                                    |                     |                                     |                      |                   |                                     |                      |
| No                                                       | 620                 | 1.01 (0.89-1.16)                    |                      | 110               | 1.40 (1.04-1.87)                    |                      |
| Yes                                                      | 21                  | 1.98 (1.05-3.73)                    | 0.05                 | 11                | 2.75 (0.89-8.50)                    | 0.40                 |
| Level of urbanization                                    |                     |                                     |                      |                   |                                     |                      |
| Rural                                                    | 107                 | 0.94 (0.76-1.15)                    |                      | 17                | 1.48 (0.96-2.28)                    |                      |
| Provincial                                               | 245                 | 1.08 (0.87-1.35)                    |                      | 47                | 1.35 (0.87-2.08)                    |                      |
| Urban                                                    | 289                 | 1.20 (0.92-1.57)                    | 0.63                 | 57                | 1.74 (0.97-3.13)                    | 0.85                 |
| Menopausal status                                        |                     |                                     |                      |                   |                                     |                      |

|                |     |                  |      |     |                  |      |
|----------------|-----|------------------|------|-----|------------------|------|
| Premenopausal  | 140 | 1.00 (0.72-1.39) |      | 15  | 2.06 (0.86-4.92) |      |
| Postmenopausal | 501 | 1.01 (0.87-1.17) | 0.29 | 106 | 1.43 (1.07-1.90) | 0.37 |

Note: Number cases (N); Myocardial infarction (MI); Hazard Ratio (HR); 95% Confidence interval (95% CI); Particulate matter with an aerodynamic diameter of  $< 2.5 \mu\text{g}/\text{m}^3$  ( $\text{PM}_{2.5}$ ); Joint expression of day ( $L_d$ ; 07:00-19:00 hours (h)), evening ( $L_e$ ; 19:00-22:00 h), and night ( $L_n$ ; 22:00-07:00 h) road traffic noise levels, with 5 and 10 dB penalties added to the evening and night estimates, respectively ( $L_{den}$ ). Estimates are based on interquartile range (IQR) increments of  $5.3 \mu\text{g}/\text{m}^3$ .

<sup>a</sup>Model 3: adjusted for age (underlying time), year of cohort entry (1993/1999), smoking status, pack-years, consumption of fruit, avoidance of fatty meat, alcohol consumption, use of oral contraceptives, use of hormone therapy, physical activity, marital status, employment status, level of urbanization, and  $L_{den}$ .

<sup>b</sup>From likelihood ratio test for interaction

<sup>c</sup>Based on Model 2: (Model 3, unadjusted for  $L_{den}$ )

<sup>d</sup>Body Mass Index  $\geq 30$

<sup>e</sup>Self-reported (diagnosed/medication for)

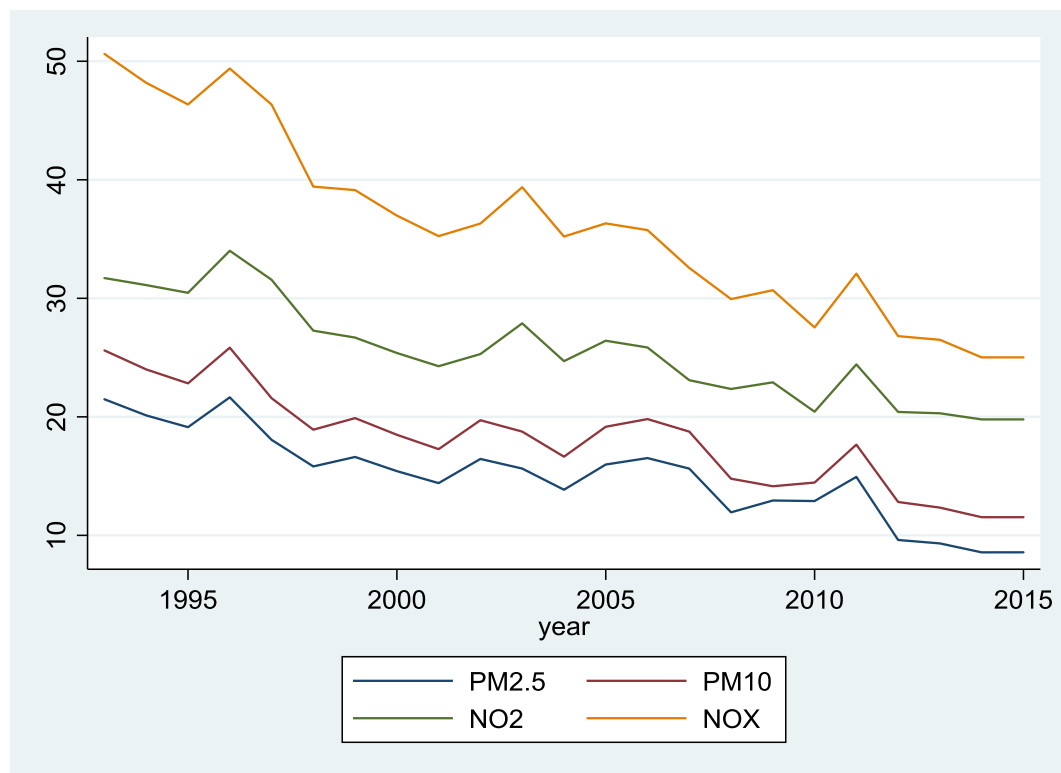

Supplemental Figure S1. Mean annual residential exposure levels for PM<sub>2.5</sub>, PM<sub>10</sub>, NO<sub>2</sub>, and NO<sub>x</sub> throughout the study period (1993-2015).
